# Supplementary material for: Role of Co3O4 in improving the hydrogen storage properties of a LiBH4–2LiNH2 composite
Source: Royal Society of Chemistry journal article supplement (doi:10.1039/c4ta01422g), 2014-01-01
Supplement: c4ta01422g1.pdf [file c4ta01422g1.pdf]

## Electronic Supplementary Information

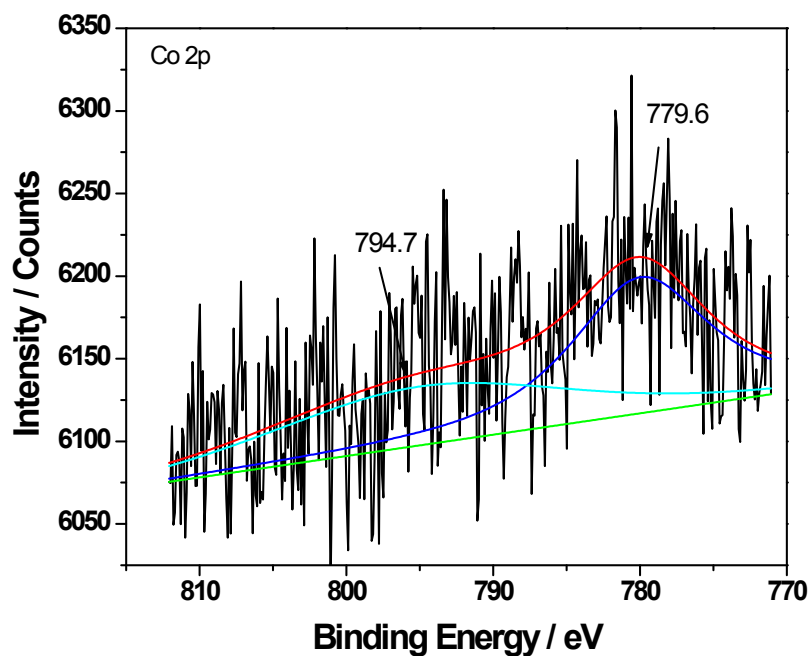

Figure S1. Co 2p spectrum of the post-milled  $\text{LiBH}_4\text{-}2\text{LiNH}_2\text{-}0.1/3\text{Co}_3\text{O}_4$  sample.

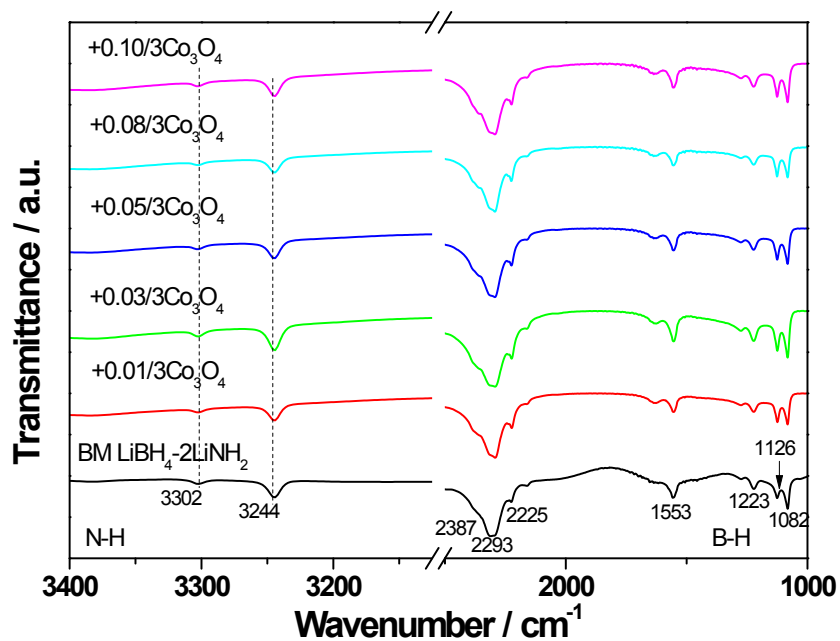

Figure S2 FTIR spectra of the as-milled  $\text{LiBH}_4\text{-}2\text{LiNH}_2\text{-}x/3\text{Co}_3\text{O}_4$  composites.

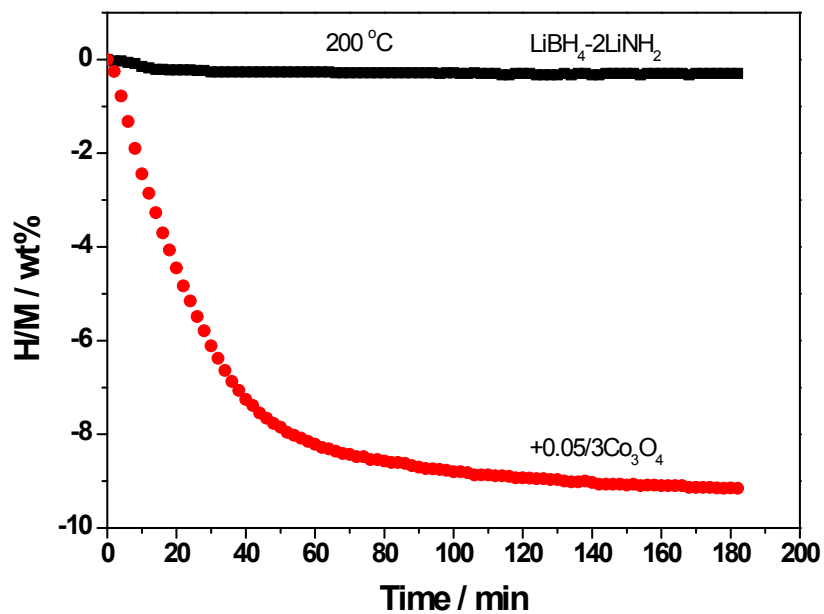

Figure S3. Isothermal dehydrogenation curves of the  $\text{LiBH}_4\text{-}2\text{LiNH}_2$  and  $\text{LiBH}_4\text{-}2\text{LiNH}_2\text{-}0.05/3\text{Co}_3\text{O}_4$  samples at 200 °C.

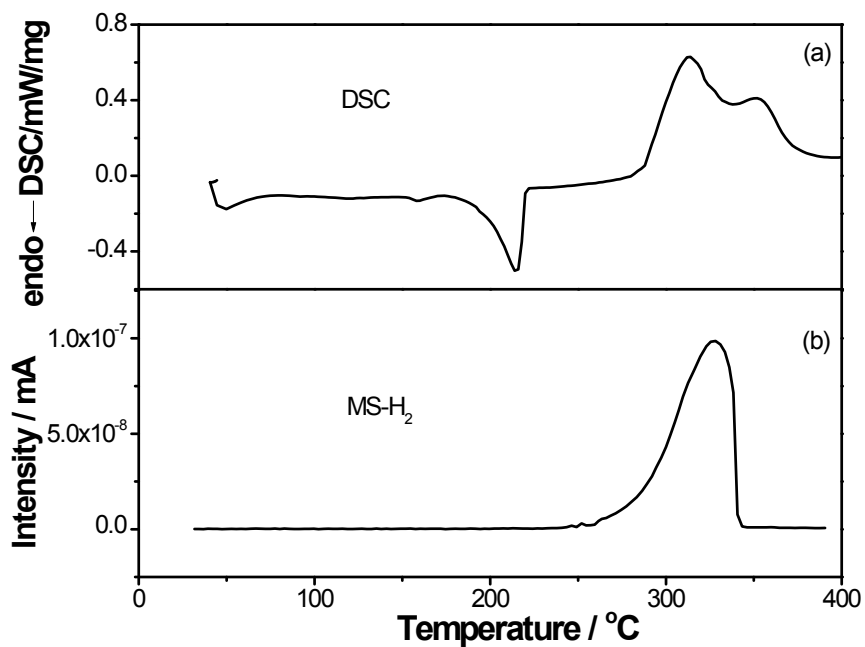

Figure S4. DSC and TPD-MS curves of the  $\text{LiBH}_4\text{-}2\text{LiNH}_2$  sample. (a) DSC, (b)  $\text{H}_2$  signal.

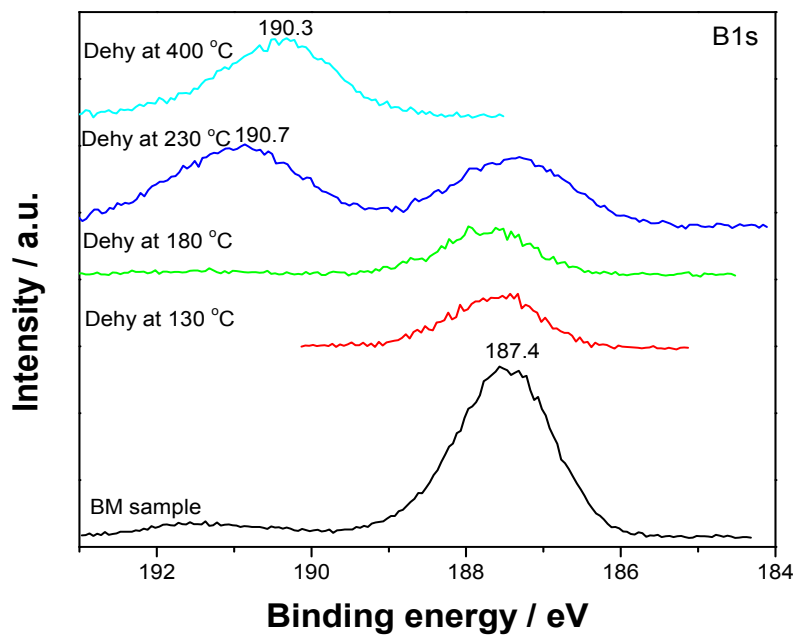

Figure S5. B 1s spectra of the dehydrogenated  $\text{LiBH}_4\text{-}2\text{LiNH}_2\text{-}0.05/3\text{Co}_3\text{O}_4$  samples at different temperatures.

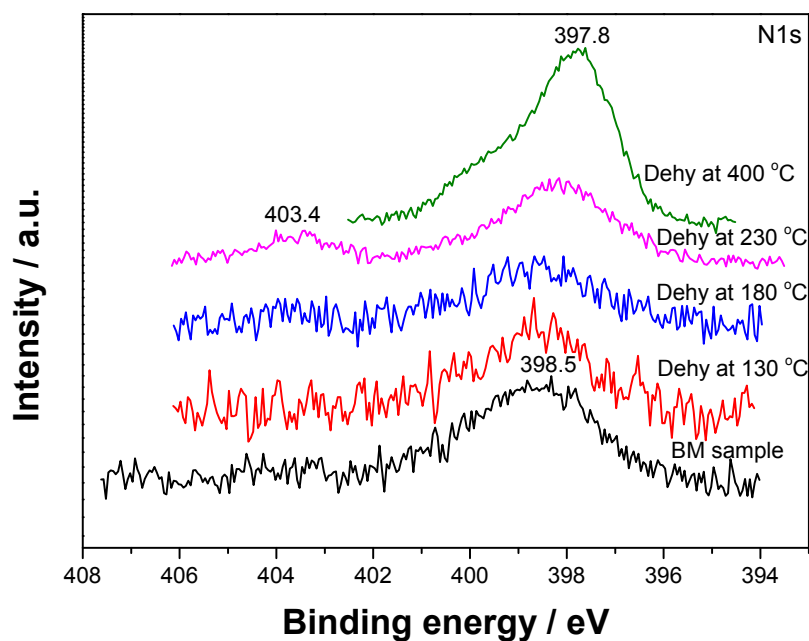

Figure S6. N 1s spectra of the dehydrogenated  $\text{LiBH}_4\text{-}2\text{LiNH}_2\text{-}0.05/3\text{Co}_3\text{O}_4$  samples at different temperatures.

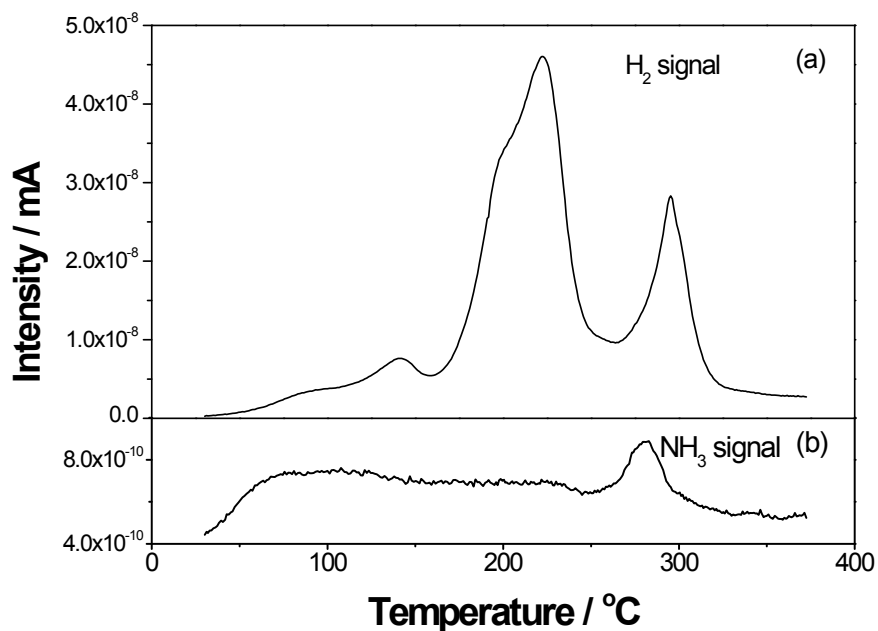

Figure S7 TPS-MS curves of the re-hydrogenated  $\text{LiBH}_4\text{-}2\text{LiNH}_2\text{-}0.05/3\text{Co}_3\text{O}_4$  sample at 220 °C and 110 bar of hydrogen pressure. (a) H<sub>2</sub> signal. (b) NH<sub>3</sub> signal.

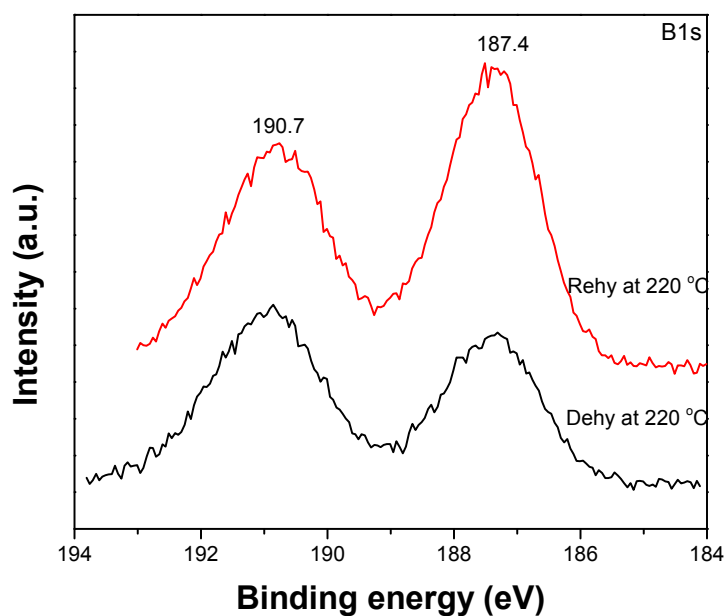

Figure S8. B 1s spectra of the re-dehydrogenated  $\text{LiBH}_4\text{-}2\text{LiNH}_2\text{-}0.05/3\text{Co}_3\text{O}_4$  samples at 220 °C and 110 bar of hydrogen pressure.
